# Supplementary material for: Mood impairment is stronger in young than in older adults after sleep deprivation
Source: PubMed Central journal article supplement — J Sleep Res. 2018 Dec 25;28(4):e12801. doi: 10.1111/jsr.12801 (PMC7379256; doi:10.1111/jsr.12801), 2018-12-25
Supplement: JSR-28-e12801-s001.pdf [file JSR-28-e12801-s001.pdf]

**Table S1**

**Results from age by sleep deprivation ANCOVA (diurnal type score as covariate)**

|                                                          | Age   |       |        | Sleep deprivation |       |        | Age x Sleep deprivation |       |        | Diurnal type score |       |      |
|----------------------------------------------------------|-------|-------|--------|-------------------|-------|--------|-------------------------|-------|--------|--------------------|-------|------|
|                                                          | F     | df    | p      | F                 | df    | p      | F                       | df    | p      | F                  | df    | p    |
| KSS                                                      | 1.1   | 1,213 | .295   | 164.41            | 1,213 | < .001 | 0.96                    | 1,213 | .327   | 0.98               | 1,213 | .324 |
| Subjective Stress                                        | 12.94 | 1,213 | < .001 | 20.21             | 1,213 | < .001 | 0.34                    | 1,213 | .562   | 5.53               | 1,213 | .020 |
| <b>Positive and Negative Affect Schedule<sup>a</sup></b> |       |       |        |                   |       |        |                         |       |        |                    |       |      |
| Positive Affect                                          | 35.98 | 1,211 | < .001 | 74.14             | 1,211 | < .001 | 1.36                    | 1,211 | .245   | 3.38               | 1,211 | .068 |
| Negative Affect                                          | 4.16  | 1,211 | .043   | 0.26              | 1,211 | .610   | 4.3                     | 1,211 | .039   | 0.01               | 1,211 | .919 |
| <b>Profile of Mood States<sup>a</sup></b>                |       |       |        |                   |       |        |                         |       |        |                    |       |      |
| Depression                                               | 10.78 | 1,211 | .001   | 8.15              | 1,211 | .005   | 7.7                     | 1,211 | .006   | 0                  | 1,211 | .954 |
| Vigour                                                   | 12.62 | 1,211 | < .001 | 89.46             | 1,211 | < .001 | 0.65                    | 1,211 | .419   | 0.17               | 1,211 | .682 |
| Confusion                                                | 17.94 | 1,211 | < .001 | 67.66             | 1,211 | < .001 | 11.81                   | 1,211 | .001   | 3.33               | 1,211 | .069 |
| Tension                                                  | 7.18  | 1,211 | .008   | 6.6               | 1,211 | .011   | 3.84                    | 1,211 | .051   | 1.94               | 1,211 | .165 |
| Anger                                                    | 7.47  | 1,211 | .007   | 4.4               | 1,211 | .037   | 7.66                    | 1,211 | .006   | 0.17               | 1,211 | .680 |
| Fatigue                                                  | 50.88 | 1,211 | < .001 | 172.47            | 1,211 | < .001 | 20.2                    | 1,211 | < .001 | 0.03               | 1,211 | .855 |
| Total Mood Disturbance                                   | 29.94 | 1,211 | < .001 | 78.42             | 1,211 | < .001 | 13.65                   | 1,211 | < .001 | 0.81               | 1,211 | .368 |
| <b>CHICa<sup>a</sup></b>                                 |       |       |        |                   |       |        |                         |       |        |                    |       |      |
| Cold                                                     | 9.34  | 1,211 | .003   | 96.58             | 1,211 | < .001 | 0.67                    | 1,211 | .413   | 2.32               | 1,211 | .129 |
| Hunger                                                   | 9.73  | 1,211 | .002   | 39.71             | 1,211 | < .001 | 6.22                    | 1,211 | .013   | 0.07               | 1,211 | .791 |
| Irritability                                             | 9.2   | 1,211 | .003   | 11.85             | 1,211 | .001   | 3.57                    | 1,211 | .060   | 0.89               | 1,211 | .347 |
| Cognitive attenuation                                    | 17.32 | 1,211 | < .001 | 122.58            | 1,211 | < .001 | 10.22                   | 1,211 | .002   | 0.8                | 1,211 | .373 |

<sup>a</sup> n= 2 missing; KSS = Karolinska Sleepiness Scale
